# Supplementary material for: A molecular sponge that exclusively adsorbs acetonitrile
Source: Royal Society of Chemistry journal article supplement (doi:10.1039/d3ce00169e), 2023-01-01
Supplement: d3ce00169e1.pdf [file d3ce00169e1.pdf]

## ***Electronic Supplementary Information***

### **A molecular sponge that exclusively adsorbs acetonitrile**

Yoichi Habata\*<sup>1,2</sup> Ayumi Wada,<sup>1</sup> Eunji Lee,<sup>3</sup> Huieyong Ju,<sup>4</sup> Yuki Yoshiba,<sup>1</sup> Hiroki Horita,<sup>1</sup> Jun-ichi Ishii,<sup>1,2</sup>

Mari Ikeda,<sup>5</sup> and Shunsuke Kuwahara<sup>1,2</sup>

<sup>1</sup>Department of Chemistry and <sup>2</sup>Research Center for Materials with Integrated Properties, Faculty of Science, Toho University, 2-2-1 Miyama, Funabashi, Chiba 274-8510, Japan

<sup>3</sup>Department of Chemistry, Gangneung-Wonju National University, Gangneung 25457, South Korea

<sup>4</sup>Western Seoul Center, Korea Basic Science Institute, 150 Bugahyeon-ro, Seodaemun-gu, Seoul 03759, Republic of Korea

<sup>5</sup>Department of chemistry, Education Center, Faculty of Engineering, Chiba Institute of Technology, Shobazono, Narashino, Chiba 275-0023, Japan

## Table of Contents

|                                                                                                             |    |
|-------------------------------------------------------------------------------------------------------------|----|
| <b>General</b> .....                                                                                        | 3  |
| <b>3-Phenyl-2-propynal (1)</b> .....                                                                        | 3  |
| <b>Fig. S1.</b> <sup>1</sup> H NMR spectrum of <b>1</b> in CDCl <sub>3</sub> .....                          | 4  |
| <b>Fig. S2.</b> IR spectrum of <b>1</b> (KBr disc).....                                                     | 4  |
| <b>Fig. S3.</b> <sup>1</sup> H NMR spectrum of <b>L</b> in CDCl <sub>3</sub> .....                          | 5  |
| <b>Fig. S4.</b> <sup>13</sup> C{ <sup>1</sup> H} NMR spectrum of <b>L</b> in CDCl <sub>3</sub> .....        | 6  |
| <b>Fig. S5.</b> IR spectrum of <b>1</b> (KBr disc).....                                                     | 6  |
| <b>CH<sub>3</sub>CN (L·AN) inclusion complex (SI video 1)</b> .....                                         | 7  |
| <b>Recrystallization of L·AN from a mixture of acetonitrile and dichloromethane (SI video 2)</b> .....      | 7  |
| <b>Fig. S6.</b> <sup>1</sup> H NMR spectrum of <b>L·AN</b> in CDCl <sub>3</sub> .....                       | 7  |
| <b>Fig. S8.</b> IR spectrum of <b>L·AN</b> inclusion complex (KBr disc).....                                | 8  |
| <b>Fig. S9.</b> TG-DTA of <b>L·AN</b> inclusion complex.....                                                | 9  |
| <b>X-ray Crystallographic Analysis</b> .....                                                                | 9  |
| <b>Fig. S11.</b> Distances of N1-N2-N1'-N2' mean planes of <b>L·AN</b> (a) and <b>L</b> (b).....            | 10 |
| <b>Table S1.</b> 1,4,7,10-tetrakis(3-phenylprop-2-yn-1-yl)-1,4,7,10-tetraazacyclododecane ( <b>L</b> )..... | 11 |
| <b>Table S2.</b> <b>L·AN</b> inclusion complex.....                                                         | 12 |
| <b>Fig. S12.</b> Binding constant for 1:1 complex between <b>L</b> and acetonitrile.....                    | 13 |

## General.

All reagents were of standard analytical grade and were used without further purification. Melting points were obtained with a Mel-Temp capillary apparatus and were not corrected. Compound **1** was prepared for the method according to the literature.<sup>[S1]</sup> The FAB mass spectra were obtained using a JEOL 600 H mass spectrometer. The <sup>1</sup>H and <sup>13</sup>C{<sup>1</sup>H} NMR spectra were measured on a JEOL ECP400 spectrometer and Bruker AVANCE II (400 MHz). The elemental analysis was carried out on a Yanaco MT-6 CHN Micro Corder. TG-DTA was measured on a Rigaku Thermo plus EVO2-TG8121.

### 3-Phenyl-2-propynal (**1**)

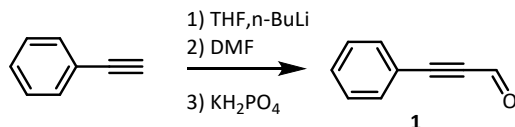

Phenylacetylene (10.9 mL, 99.0 mmol) in absolute tetrahydrofuran (250 mL) was stirred at  $-40\text{ }^{\circ}\text{C}$  under a nitrogen atmosphere for 30 minutes, then *n*-butyl lithium (70.0 mL, 107 mmol) was added slowly dropwise (temperature:  $-40\text{ }^{\circ}\text{C}$  to  $-35\text{ }^{\circ}\text{C}$ ) and stirred for 5 minutes. Dry *N,N*-dimethylformamide (16.0 mL, 200 mmol) was added to the reaction mixture and stirred for 10 min. The solution was allowed to stand at room temperature for 12 hr, and then the solution was added to a mixture of 10% potassium dihydrogen phosphate solution (540 mL) and methyl *tert*-butyl ether (500 mL) and stirred for 10 minutes. After the hydrolysis reaction was completed, the mixture was washed with water (200 mL x 2). The aqueous layer was extracted with methyl *tert*-butyl ether (200 mL x 1). The organic layer was combined, dried over sodium sulfate, and filtered through Celite. After removing the organic solvent, the mixture was dried under reduced pressure to give a brown oily mixture. The reaction product was separated and purified by silica gel column chromatography (hexane:ethyl acetate = 9:1) to give compound **1** as a red oil. Yield 91% (11.7 g, lit. 97%<sup>[S1]</sup>); <sup>1</sup>H-NMR (400 MHz; CDCl<sub>3</sub>)  $\delta$  9.43 (s, 1H), 7.61 (dt,  $J_{\text{ortho}} = 7.4\text{ Hz}$ ,  $J_{\text{meta}} = 1.5\text{ Hz}$ , 2H), 7.50 (tt,  $J_{\text{ortho}} = 7.4\text{ Hz}$ ,  $J_{\text{meta}} = 1.5\text{ Hz}$ , 1H), 7.41 (tt,  $J_{\text{ortho}} = 7.4\text{ Hz}$ ,  $J_{\text{meta}} = 1.5\text{ Hz}$ , 2H); FAB-MS (matrix: DTT:TG = 1:1)  $m/z$  131 ([M+H]<sup>+</sup>, 100%); IR (KBr disc) 2855, 2738, 2189, and 1660  $\text{cm}^{-1}$ .

[S1] Journet, M.; Cai, D.; DiMichele, L. M.; Larsen, R. D. Highly efficient synthesis of  $\alpha,\beta$ -acetylenic aldehydes from terminal alkynes using DMF as the formylating reagent. *Tetrahedron Lett.* **1998**, *39*, 6427-6428.

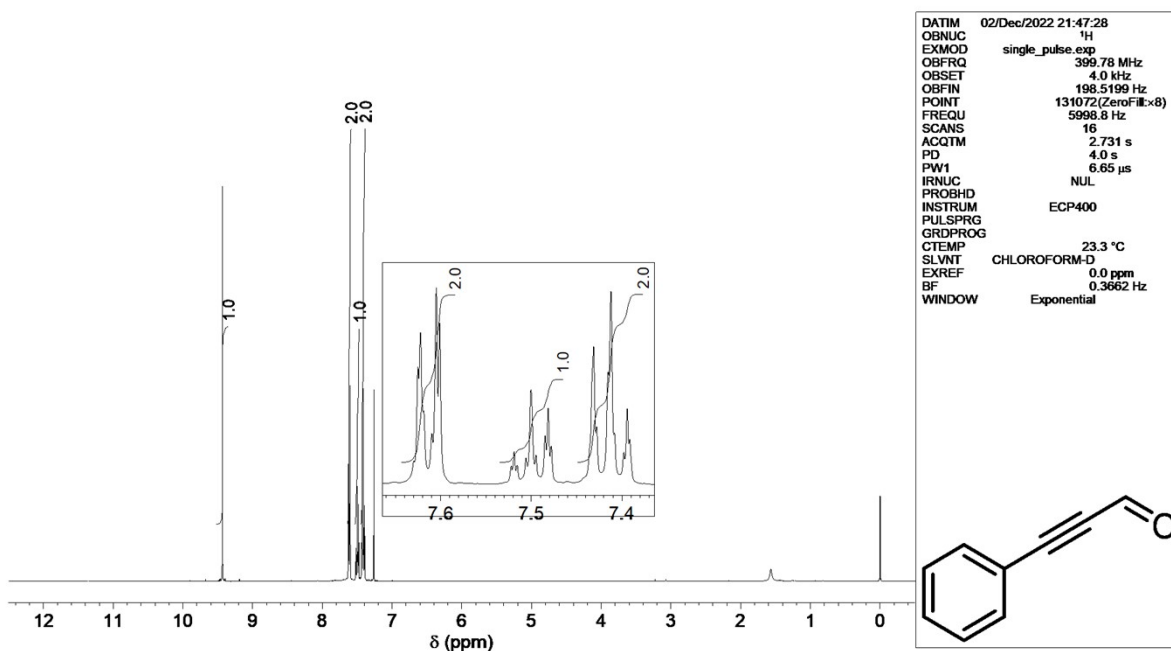

Fig. S1. <sup>1</sup>H NMR spectrum of **1** in CDCl<sub>3</sub>.

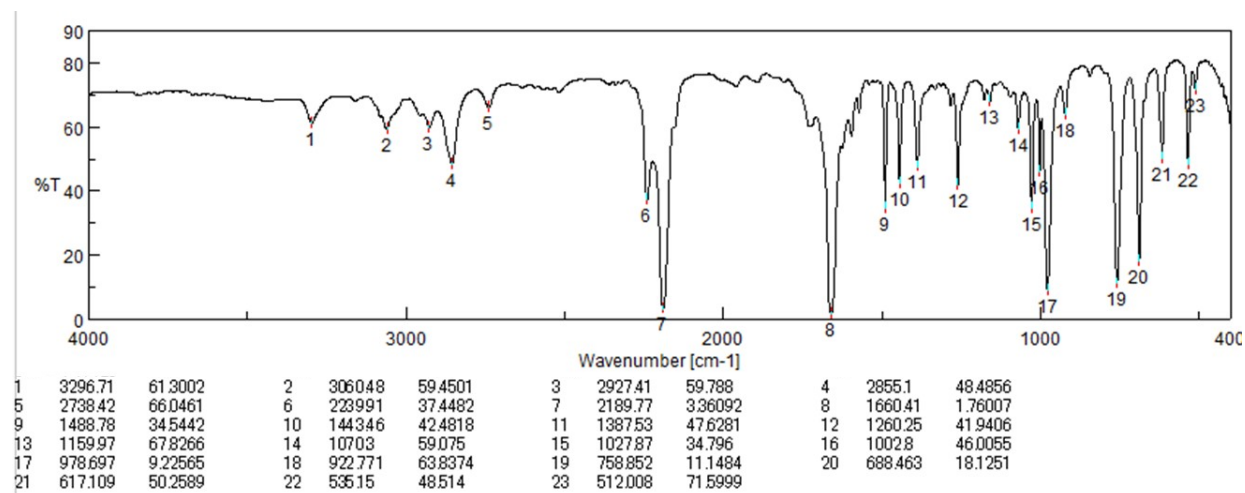

Fig. S2. IR spectrum of **1** (KBr disc).

### 1,4,7,10-Tetrakis(3-phenylprop-2-yn-1-yl)-1,4,7,10-tetraazacyclododecane (L)

A mixture of 1,4,7,10-tetraazacyclododecane (0.64 g, 3.7 mmol), 1 (2.6 g, 20 mmol), and sodium triacetoxyborohydride

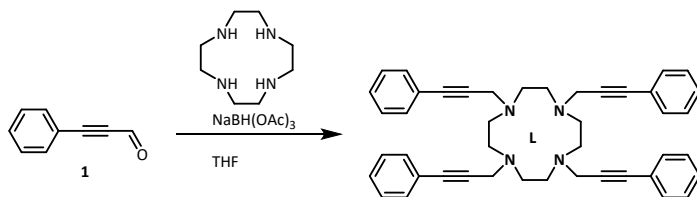

(4.6 g, 22 mmol) in anhydrous tetrahydrofuran (70.0 mL) were stirred at room temperature under nitrogen atmosphere for two days. The reaction mixture was neutralized by adding a saturated aqueous sodium bicarbonate solution and extracted with ethyl acetate (40 mL x 3). The organic layers were combined, dried over anhydrous sodium sulfate, filtered by suction, and removed the organic solvent under reduced pressure. To the residual oil, 5.0 mL of propionitrile was added, and after filtration by suction to obtain crude crystals, which were recrystallized again from propionitrile to give yellow needle-like crystals. After the filtrate was concentrated under reduced pressure, the residual oil was separated and purified by silica gel column chromatography (EtOAc:CH<sub>3</sub>OH:NH<sub>3</sub> aq.=15:1:0.04). The yellow needle-like crystals were obtained by recrystallization with propionitrile. The total weight of these crystals was 1.80 g. Yield 78%; m.p.: 104.7–105.1 °C; <sup>1</sup>H NMR (400 MHz, CDCl<sub>3</sub>) δ 7.43–7.40 (m, 8H), 7.30–7.27 (m, 12H), 3.70 (s, 8H), 2.86 (s, 16H); <sup>13</sup>C{<sup>1</sup>H} NMR (100 MHz; solvent peak (77.17 ppm) of CDCl<sub>3</sub> was used as a reference) δ 132.2 (C<sub>O-Ph</sub>), 128.7 (C<sub>m-Ph</sub>), 128.4 (C<sub>p-Ph</sub>), 123.7 (C<sub>Ph-C≡C</sub>), 85.6 (C≡C), 85.4 (C≡C), 52.4 (N-CH<sub>2</sub>-C≡C), 45.2 (N-CH<sub>2</sub>CH<sub>2</sub>-N); FAB-MS (matrix: DTT:TG = 1:1) *m/z* 630 ([M+H]<sup>+</sup>, 47%); IR (KBr disc) 3048, 2952, 2225, 1596, and 1137 cm<sup>-1</sup>. Anal. Calcd. for C<sub>44</sub>H<sub>44</sub>N<sub>4</sub>: C, 84.04; H, 7.05; N, 8.91. Found: C, 84.28; H, 6.80; N, 8.92.

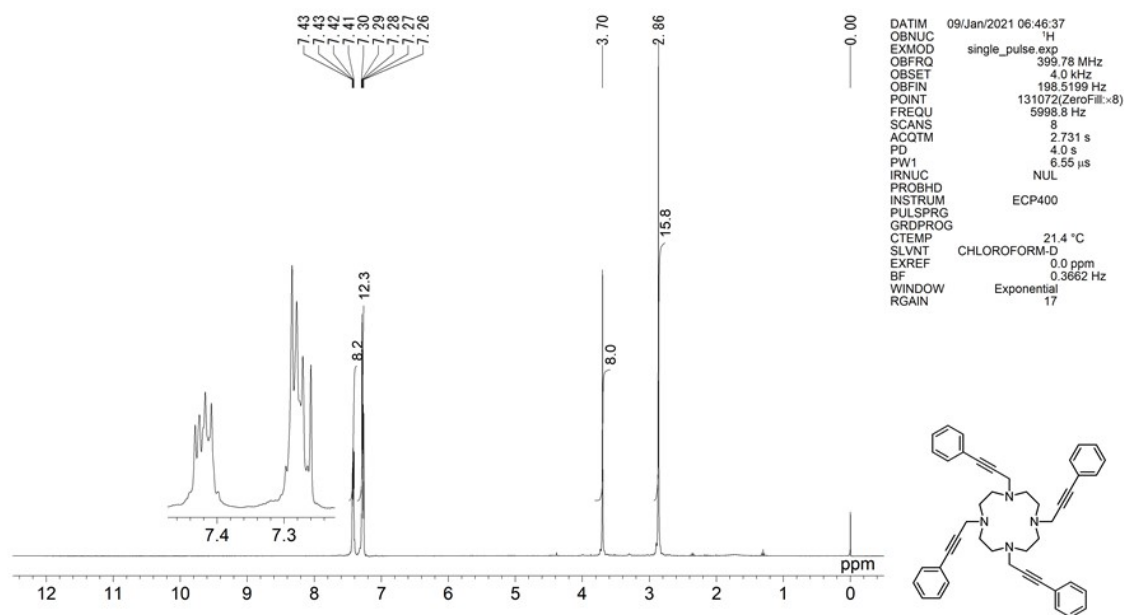

Fig. S3. <sup>1</sup>H NMR spectrum of L in CDCl<sub>3</sub>.

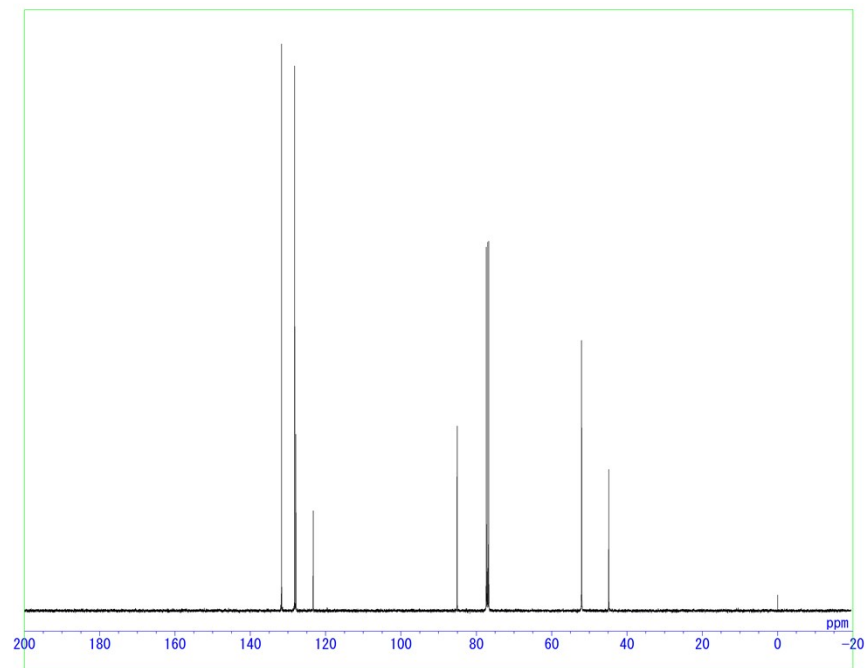

```

DFILE C:\USERS\HABATY\APPDATA\LOCAL\TEMP\T
EMP1_LとL-ANの13C NMR-20221219T082019Z
-001_ZIPYLとL-ANの13C NMR\20221213_Y05
HIBA_L_13C_CDCL3.RM1
DATIM 13/Dec/2022 19:31:00
COMNT
OBNUC 13C
EXMOD ZGPG30
OBFREQ 100.61 MHz
OBSSET 0.0 kHz
OBFIN 10005.84 Hz
POINT 32768
FREQU 24038.46 Hz
SCANS 1024
ACQTM 1.3631 s
PD 2.0 s
PWI 8.0 μs
IRNUC OFF
PROBHD 5 MM PABBO BB-1H/D Z-GRD Z104450
INSTRUM SPECT
PULSPRG ZGPG30
GRDPRG
CTEMP 24.45 °C
SLVNT CDCL3
EXREF 0.0 ppm
BF 0.25 Hz

```

Fig. S4.  $^{13}\text{C}\{^1\text{H}\}$  NMR spectrum of **L** in  $\text{CDCl}_3$ .

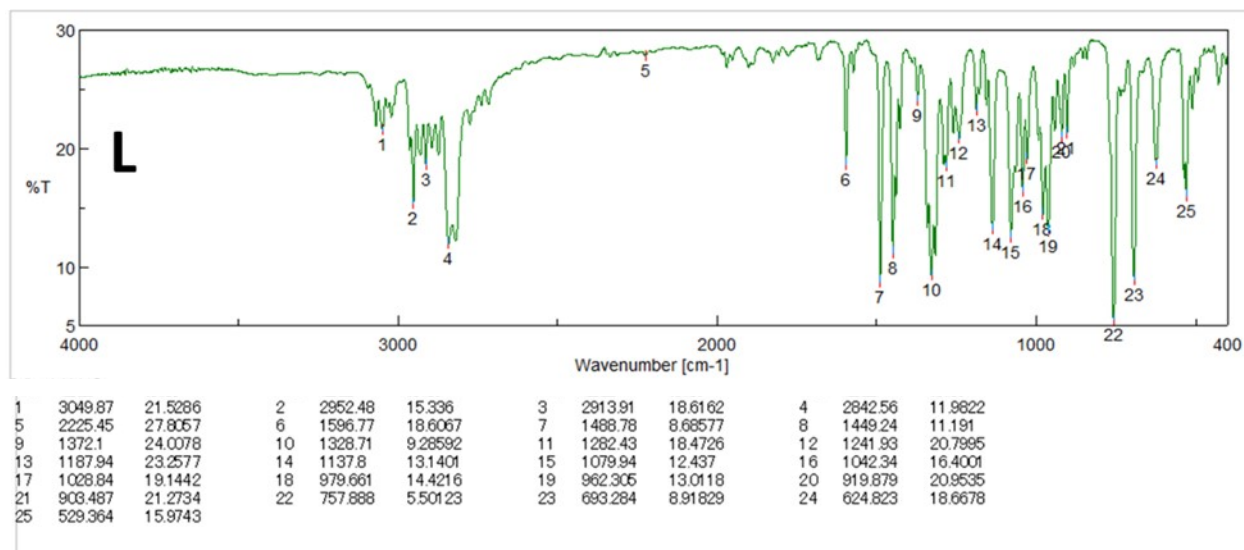

Fig. S5. IR spectrum of **1** (KBr disc).

### CH<sub>3</sub>CN (L·AN) inclusion complex (SI video 1).

Ligand **L** (5.0 mg, 0.0080 mmol) was dissolved in 0.4 mL of acetonitrile and allowed to stand at room temperature. The single crystals of the **L**·CH<sub>3</sub>CN inclusion complex were obtained with 94% yields. Mp: 99.5–100.0 °C; <sup>1</sup>H NMR (400 MHz, CDCl<sub>3</sub>) δ 7.43–7.40 (m, 8H), 7.30–7.27 (m, 12H), 3.70 (s, 8H), 2.86 (s, 16H); <sup>13</sup>C{<sup>1</sup>H} NMR (100 MHz; TMS) δ 131.7 (C<sub>o-ph</sub>), 128.2 (C<sub>m-ph</sub>), 127.9 (C<sub>p-ph</sub>), 123.3 (C<sub>ph-C≡C</sub>), 116.3 (C≡N), 85.1 (C≡C), 52.0 (N-CH<sub>2</sub>-C≡C), 44.8 (N-CH<sub>2</sub>CH<sub>2</sub>-N), 1.9 (CH<sub>3</sub>C≡N); IR (KBr disc) 3062, 2932, 2240, 1595, and 1111 cm<sup>-1</sup>. Anal. Calcd. for C<sub>44</sub>H<sub>44</sub>N<sub>4</sub>+CH<sub>3</sub>CN: C, 82.47; H, 7.07; N, 10.45. Found: C, 82.40; H, 7.12; N, 10.32.

### Recrystallization of L·AN from a mixture of acetonitrile and dichloromethane (SI video 2).

**L** of dichloromethane saturated solution was added dropwise slowly to acetonitrile (2.5 mL), and after 1 mL of the saturated solution was added, white powder was precipitated. The precipitated white powder was dried under reduced pressure at room temperature and subjected to elemental analysis. Anal. C<sub>44</sub>H<sub>44</sub>N<sub>4</sub>+CH<sub>3</sub>CN+0.05CH<sub>2</sub>Cl<sub>2</sub>: C, 82.04; H, 7.04; N, 10.39. Found: C, 82.01; H, 6.93; N, 10.43.

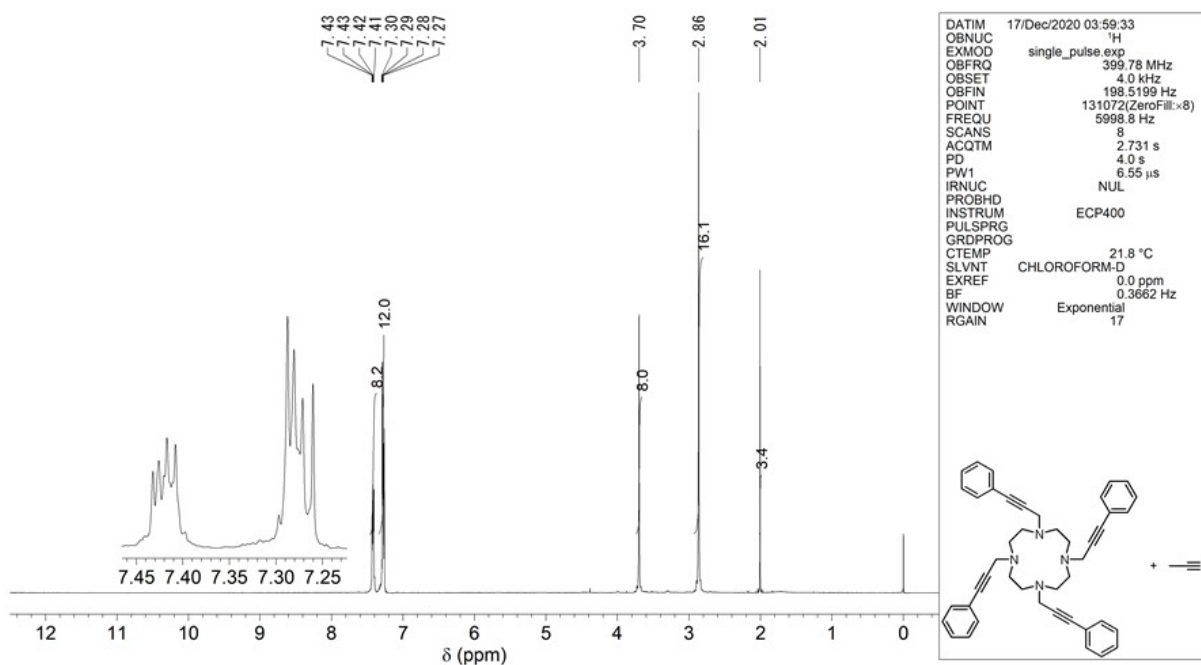

Fig. S6. <sup>1</sup>H NMR spectrum of **L**·AN in CDCl<sub>3</sub>.

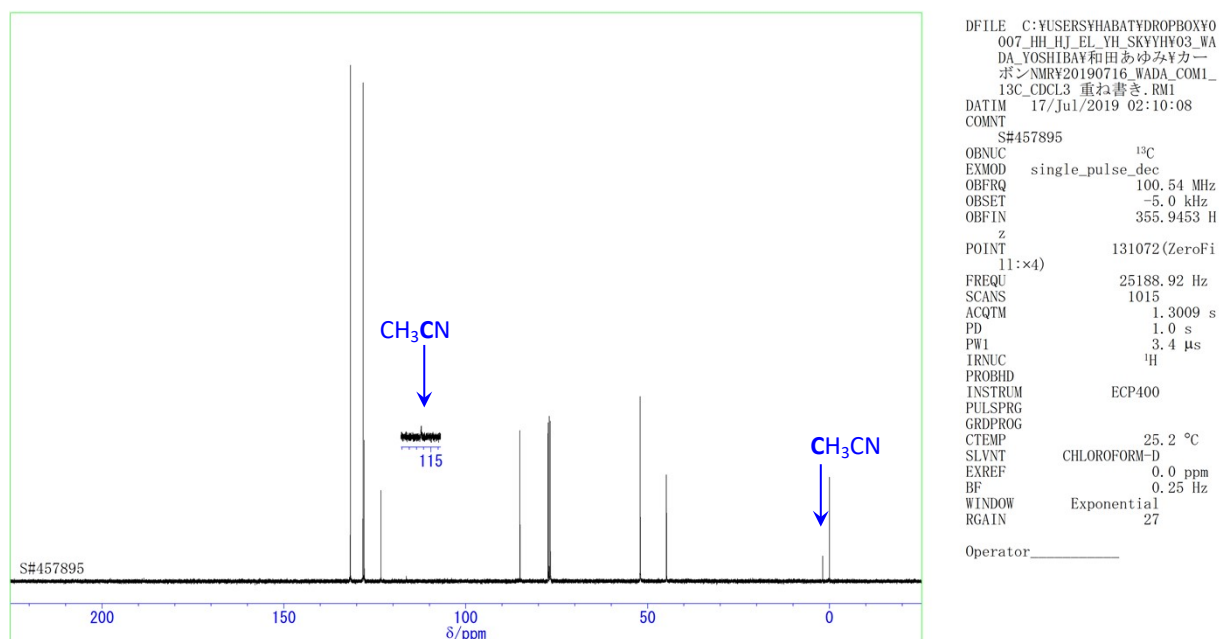

Fig. S7. <sup>13</sup>C{<sup>1</sup>H} NMR spectrum of L-AN in CDCl<sub>3</sub>.

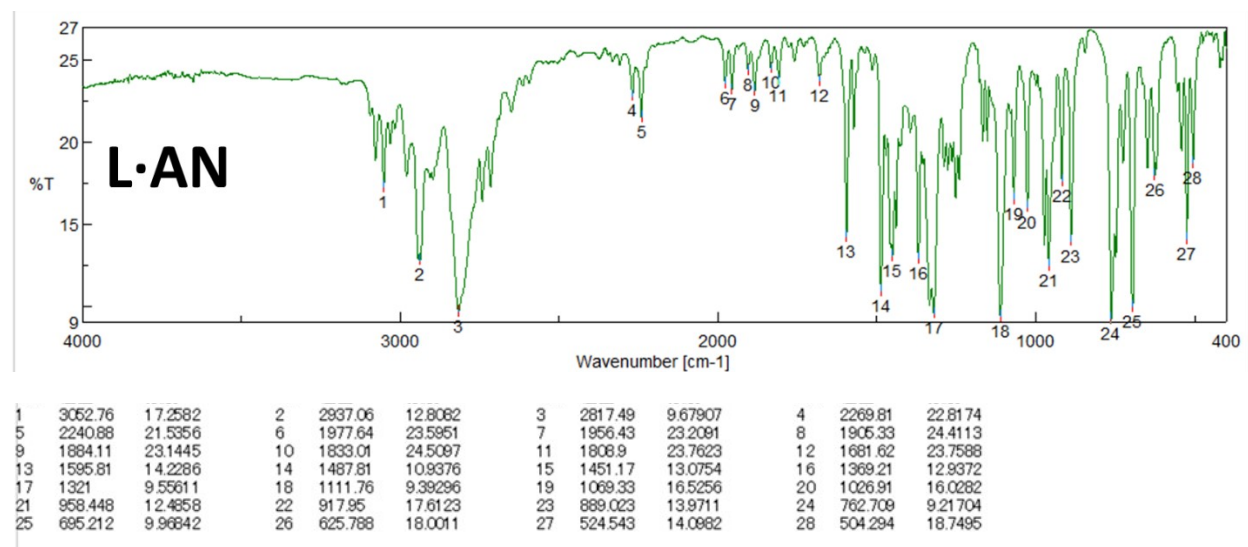

Fig. S8. IR spectrum of L-AN inclusion complex (KBr disc).



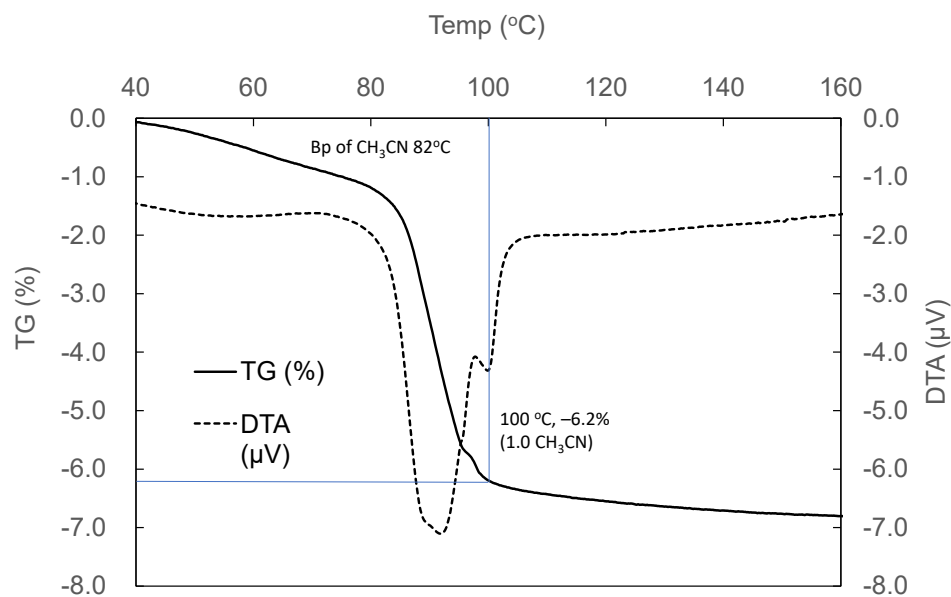

**Fig. S9.** TG-DTA of **L·AN** inclusion complex.

#### **X-ray Crystallographic Analysis.**

X-ray data was collected on a Bruker SMART APEX II ULTRA diffractometer equipped with graphite monochromated Mo  $K_{\alpha}$  radiation ( $\lambda = 0.71073 \text{ \AA}$ ) generated by a rotating anode. The cell parameters for the compounds were obtained from a least-squares refinement of the spot. Data collection, data reduction and semi-empirical absorption correction were carried out using the software package of APEX2.<sup>[S2]</sup> All of the calculations for the structure determination were carried out using the SHELXTL package.<sup>[S3]</sup> In all cases, nonhydrogen atoms were refined anisotropically and hydrogen atoms were placed in idealized positions and refined isotropically in a riding manner along with their respective parent atoms. Relevant crystal data collection and refinement data for the crystal structures are summarized in Table S1. CCDC 2233509 (**L**) and 2233510 (**L·AN**) contain the supplementary crystallographic data for this paper. These data can be obtained free of charge from The Cambridge Crystallographic Data Centre via [www.ccdc.cam.ac.uk/data\\_request/cif](http://www.ccdc.cam.ac.uk/data_request/cif).

[S2] APEX2 Version 2009.1-0 Data collection and Processing Software; Bruker AXS Inc.: Madison, WI, 2008.

[S3] G. M. Sheldrick, *Acta Crystallogr.* 2015, **C71**, 3–8.

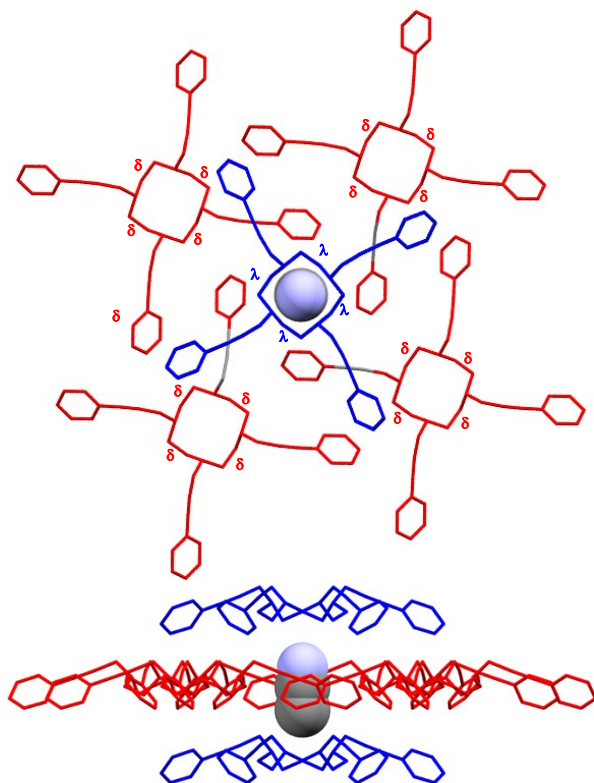

Fig. S10. Top view and side view of packing diagram of L·AN.

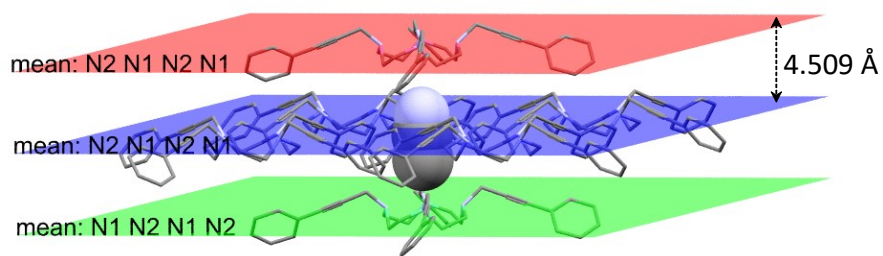

(a)

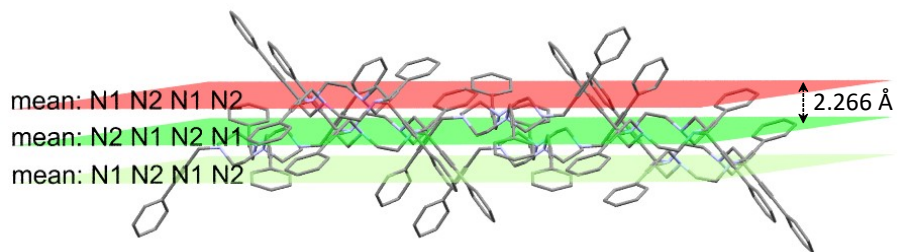

(b)

Fig. S11. Distances of N1-N2-N1'-N2' mean planes of L·AN (a) and L (b).

**Table S1.** 1,4,7,10-tetrakis(3-phenylprop-2-yn-1-yl)-1,4,7,10-tetraazacyclododecane (L).

|                                   |                                                |                 |
|-----------------------------------|------------------------------------------------|-----------------|
| Empirical formula                 | C <sub>44</sub> H <sub>44</sub> N <sub>4</sub> |                 |
| Formula weight                    | 628.83                                         |                 |
| Temperature                       | 120(2) K                                       |                 |
| Wavelength                        | 0.71073 Å                                      |                 |
| Crystal system                    | Monoclinic                                     |                 |
| Space group                       | P2 <sub>1</sub> /c                             |                 |
| Unit cell dimensions              | a = 10.825(5) Å                                | a = 90°.        |
|                                   | b = 18.151(8) Å                                | b = 97.156(8)°. |
|                                   | c = 9.211(4) Å                                 | g = 90°.        |
| Volume                            | 1795.7(14) Å <sup>3</sup>                      |                 |
| Z                                 | 2                                              |                 |
| Density (calculated)              | 1.163 Mg/m <sup>3</sup>                        |                 |
| Absorption coefficient            | 0.068 mm <sup>-1</sup>                         |                 |
| F(000)                            | 672                                            |                 |
| Crystal size                      | 0.244 x 0.135 x 0.065 mm <sup>3</sup>          |                 |
| Theta range for data collection   | 1.896 to 26.000°.                              |                 |
| Index ranges                      | -12 ≤ h ≤ 13, -22 ≤ k ≤ 21, -11 ≤ l ≤ 10       |                 |
| Reflections collected             | 10326                                          |                 |
| Independent reflections           | 3530 [R(int) = 0.1711]                         |                 |
| Completeness to theta = 25.242°   | 99.9 %                                         |                 |
| Absorption correction             | Semi-empirical from equivalents                |                 |
| Max. and min. transmission        | 0.7457 and 0.5659                              |                 |
| Refinement method                 | Full-matrix least-squares on F <sup>2</sup>    |                 |
| Data / restraints / parameters    | 3530 / 0 / 217                                 |                 |
| Goodness-of-fit on F <sup>2</sup> | 1.008                                          |                 |
| Final R indices [I > 2σ(I)]       | R1 = 0.0755, wR2 = 0.1391                      |                 |
| R indices (all data)              | R1 = 0.2119, wR2 = 0.1969                      |                 |
| Extinction coefficient            | n/a                                            |                 |
| Largest diff. peak and hole       | 0.264 and -0.324 e.Å <sup>-3</sup>             |                 |

**Table S2. L·AN inclusion complex.**

|                                   |                                                |          |
|-----------------------------------|------------------------------------------------|----------|
| Empirical formula                 | C <sub>46</sub> H <sub>47</sub> N <sub>5</sub> |          |
| Formula weight                    | 669.89                                         |          |
| Temperature                       | 120(2) K                                       |          |
| Wavelength                        | 0.71073 Å                                      |          |
| Crystal system                    | Tetragonal                                     |          |
| Space group                       | P4nc                                           |          |
| Unit cell dimensions              | a = 14.404(7) Å                                | a = 90°. |
|                                   | b = 14.404(7) Å                                | b = 90°. |
|                                   | c = 9.018(8) Å                                 | g = 90°. |
| Volume                            | 1871(2) Å <sup>3</sup>                         |          |
| Z                                 | 2                                              |          |
| Density (calculated)              | 1.189 Mg/m <sup>3</sup>                        |          |
| Absorption coefficient            | 0.070 mm <sup>-1</sup>                         |          |
| F(000)                            | 716                                            |          |
| Crystal size                      | 0.265 x 0.11 x 0.106 mm <sup>3</sup>           |          |
| Theta range for data collection   | 1.999 to 25.997°.                              |          |
| Index ranges                      | -17<=h<=17, -17<=k<=13, -10<=l<=11             |          |
| Reflections collected             | 9633                                           |          |
| Independent reflections           | 1794 [R(int) = 0.1687]                         |          |
| Completeness to theta = 25.242°   | 99.9 %                                         |          |
| Absorption correction             | Semi-empirical from equivalents                |          |
| Max. and min. transmission        | 0.7457 and 0.5862                              |          |
| Refinement method                 | Full-matrix least-squares on F <sup>2</sup>    |          |
| Data / restraints / parameters    | 1794 / 1 / 118                                 |          |
| Goodness-of-fit on F <sup>2</sup> | 1.072                                          |          |
| Final R indices [I>2sigma(I)]     | R1 = 0.0786, wR2 = 0.1657                      |          |
| R indices (all data)              | R1 = 0.1918, wR2 = 0.2340                      |          |
| Absolute structure parameter      | ?                                              |          |
| Extinction coefficient            | n/a                                            |          |
| Largest diff. peak and hole       | 0.161 and -0.226 e.Å <sup>-3</sup>             |          |

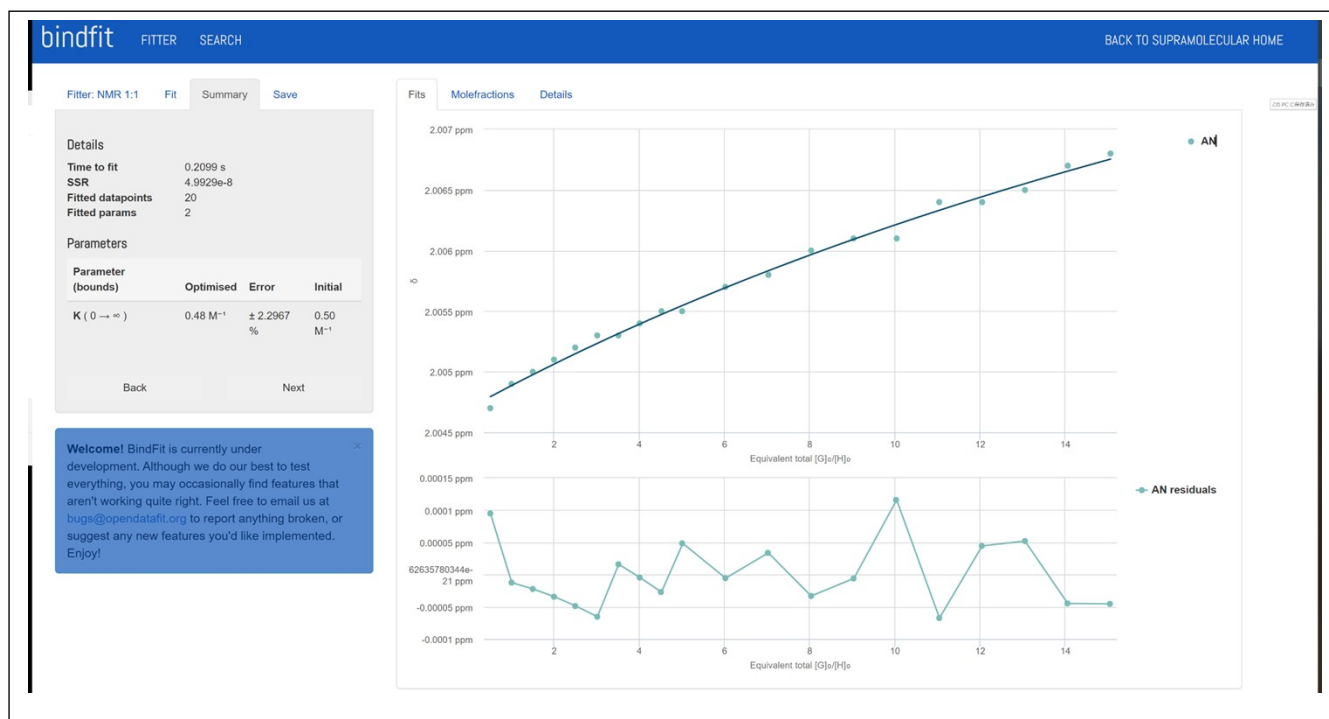

Fig. S12. Binding constant for 1:1 complex between L and acetonitrile.
